# Supplementary material for: Epidemiology and trends of hip fracture in centenarians: changes in clinical profile and in-hospital outcomes from a nationwide register study in Spain across 2004–2020
Source: Springer Nature journal article supplement (doi:10.1007/s40520-025-02994-w), 2025-03-13
Supplement: MOESM1 [file 40520_2025_2994_MOESM1_ESM.pdf]

## SUPPLEMENTARY MATERIAL

**Supplementary Table 1.** Secondary diagnosis clustering in comorbidity groups according to the ICD-10-CM for data analysis.

| Group of diseases                                                                                             | Specific condition                                                                                                                 | Total (%) |
|---------------------------------------------------------------------------------------------------------------|------------------------------------------------------------------------------------------------------------------------------------|-----------|
| Certain infectious and parasitic diseases (A00-B99)                                                           | Other infectious diseases (enteric infectious diseases, mycoses, viral infectious diseases, tuberculosis)                          | 1.2%      |
|                                                                                                               | Other bacterial diseases not specified                                                                                             | 1.2%      |
|                                                                                                               | Sepsis                                                                                                                             | 0.4%      |
| Neoplasms (C00-D49)                                                                                           | Personal history of previous malignant neoplasm                                                                                    | 5.8%      |
|                                                                                                               | Active malignant neoplasm (solid organ neoplasm without metastases, solid organ neoplasm with metastases, haematological neoplasm) | 2.6%      |
|                                                                                                               |                                                                                                                                    |           |
| Diseases of the blood and blood-forming organs and certain disorders involving the immune mechanism (D50-D89) | Anemia                                                                                                                             | 27.2%     |
| Endocrine, nutritional and metabolic diseases (E00-E89)                                                       | Diabetes (diabetes with target organ damage, diabetes without target organ damage)                                                 | 9.8%      |
|                                                                                                               | Malnutrition                                                                                                                       | 8.2%      |
|                                                                                                               | Dyslipemia                                                                                                                         | 7.4%      |
|                                                                                                               | Electrolyte disturbance                                                                                                            | 5.4%      |
|                                                                                                               | Thyroid disease                                                                                                                    | 4.1%      |
|                                                                                                               | Obesity                                                                                                                            | 0.7%      |
|                                                                                                               |                                                                                                                                    |           |
| Mental, Behavioral and Neurodevelopmental disorders (F01-F99)                                                 | Dementia                                                                                                                           | 13.8%     |
|                                                                                                               | Delirium                                                                                                                           | 6.9%      |
|                                                                                                               | Other mental disorders                                                                                                             | 4.6%      |
|                                                                                                               | Depression and anxiety                                                                                                             | 2.8%      |
| Diseases of the nervous system (G00-G99)                                                                      | Movement disorders                                                                                                                 | 1.4%      |
|                                                                                                               | Epilepsy                                                                                                                           | 0.5%      |
| Diseases of the eye and adnexa (H00-H59)                                                                      | Visual loss                                                                                                                        | 7.2%      |
| Diseases of the ear and mastoid process (H60-H95)                                                             | Hearing loss                                                                                                                       | 9.3%      |
| Diseases of the circulatory system (I00-I99)                                                                  | Hypertension                                                                                                                       | 42.5%     |
|                                                                                                               | Atrial fibrillation                                                                                                                | 12.3%     |
|                                                                                                               | Heart failure                                                                                                                      | 12.2%     |
|                                                                                                               | Coronary heart disease                                                                                                             | 6.7%      |
|                                                                                                               | Cerebrovascular disease                                                                                                            | 5.5%      |
|                                                                                                               | Other arrhythmias                                                                                                                  | 3.9%      |
|                                                                                                               | Cardiac devices                                                                                                                    | 3%        |
|                                                                                                               | Chronic peripheral venous insufficiency                                                                                            | 2.5%      |
|                                                                                                               | Valvular heart diseases                                                                                                            | 2.2%      |
|                                                                                                               | Venous thromboembolic disease                                                                                                      | 2%        |
|                                                                                                               | Atherosclerosis/peripheral arterial disease/non-coronary artery disease                                                            | 1.7%      |
|                                                                                                               |                                                                                                                                    |           |
|                                                                                                               |                                                                                                                                    |           |
|                                                                                                               |                                                                                                                                    |           |

|                                                                              |                                                               |       |
|------------------------------------------------------------------------------|---------------------------------------------------------------|-------|
| Diseases of the respiratory system (J00-J99)                                 | Chronic pulmonary disease (asthma or COPD)                    | 6.4%  |
|                                                                              | Acute respiratory failure                                     | 6%    |
|                                                                              | Respiratory tract infection                                   | 4.7%  |
|                                                                              | Chronic respiratory failure                                   | 0.9%  |
| Diseases of the digestive system (K00-K95)                                   | Intra-abdominal infection                                     | 0.7%  |
|                                                                              | Chronic liver disease                                         | 0.4%  |
|                                                                              | Diverticular disease                                          | 1.5%  |
|                                                                              | Peptic gastro-duodenal or ulcerative disease                  | 0.2%  |
|                                                                              | Constipation or adynamic ileus                                | 5.9%  |
|                                                                              | Pathology of the gallbladder and biliary and pancreatic ducts | 1.5%  |
|                                                                              | Gastro-intestinal hemorrhage                                  | 1.2%  |
|                                                                              | Other digestive disease                                       | 1.2%  |
| Diseases of the skin and subcutaneous tissue (L00-L99)                       | Infections of the skin and subcutaneous tissue                | 0.2%  |
|                                                                              | Pressure ulcers                                               | 4.3%  |
| Diseases of the musculoskeletal system and connective tissue (M00-M99)       | Osteoarthritis                                                | 7%    |
|                                                                              | Osteoporosis                                                  | 6.8%  |
|                                                                              | Connective tissue diseases                                    | 0%    |
| Diseases of the genitourinary system (N00-N99)                               | Chronic kidney disease                                        | 12.1% |
|                                                                              | Acute kidney injury                                           | 7.5%  |
|                                                                              | Urinary tract infection                                       | 5.2%  |
|                                                                              | Urinary incontinence                                          | 4.9%  |
|                                                                              | Benign prostatic hyperplasia                                  | 2.9%  |
|                                                                              | Gynecological diseases                                        | 1.8%  |
| External causes of morbidity (V00-Y99)                                       | Pharmacologic or procedure-related complications              | 9.4%  |
|                                                                              | Tobacco use                                                   | 1%    |
|                                                                              | Alcohol abuse                                                 | 0%    |
| Factors influencing health status and contact with health services (Z00-Z99) | Incidental fall                                               | 29.6% |
|                                                                              | Place of residence, nursing home                              | 14.2% |
|                                                                              | Personal history of previous joint replacement                | 2.5%  |
|                                                                              | Social problems                                               | 2%    |
|                                                                              | Admission to palliative care                                  |       |
|                                                                              | Antimicrobial resistance                                      | 0.4%  |

*Note:* COPD: chronic obstructive pulmonary disease.

**Supplementary Table 2.** Trends in hip fracture admissions in centenarians in Spain, by sex, 2004-2020. Joinpoint regression analysis.

|                                       |                   |       |       |       |       |       |       |       |       |       |       |       |       |      |      |       |      |       |           | TREND 1   |                   | TREND 2   |                   |
|---------------------------------------|-------------------|-------|-------|-------|-------|-------|-------|-------|-------|-------|-------|-------|-------|------|------|-------|------|-------|-----------|-----------|-------------------|-----------|-------------------|
|                                       |                   | 2004  | 2005  | 2006  | 2007  | 2008  | 2009  | 2010  | 2011  | 2012  | 2013  | 2014  | 2015  | 2016 | 2017 | 2018  | 2019 | 2020  | %increase | Years     | APC (95% CI)      | Years     | APC (95% CI)      |
| No. hip fracture admissions           | Total             | 147   | 162   | 185   | 180   | 184   | 177   | 214   | 264   | 275   | 273   | 283   | 306   | 277  | 303  | 364   | 328  | 339   | 130.6%    |           |                   |           |                   |
|                                       | Males             | 28    | 28    | 32    | 32    | 33    | 33    | 46    | 32    | 42    | 48    | 45    | 47    | 53   | 52   | 59    | 45   | 57    | 103.6%    |           |                   |           |                   |
|                                       | Females           | 119   | 134   | 153   | 148   | 151   | 144   | 168   | 232   | 233   | 225   | 238   | 259   | 224  | 251  | 305   | 283  | 282   | 137.0%    |           |                   |           |                   |
|                                       | Ratio Female:Male | 4.3   | 4.8   | 4.8   | 4.6   | 4.6   | 4.4   | 3.7   | 7.3   | 5.5   | 4.7   | 5.3   | 5.5   | 4.2  | 4.8  | 5.2   | 6.3  | 4.9   | 16.4%     |           |                   |           |                   |
| % Total admissions (x100,000)         | Total             | 4.2   | 4.6   | 5.2   | 4.9   | 4.9   | 4.7   | 5.8   | 7.2   | 7.5   | 7.5   | 7.7   | 8.2   | 6.4  | 6.7  | 8.1   | 7.3  | 8.5   | 103.1%    | 2004-2020 | 3.8 (2.4;5.3)*    |           |                   |
|                                       | Males             | 1.7   | 1.7   | 1.9   | 1.9   | 1.9   | 1.9   | 2.6   | 1.8   | 2.4   | 2.8   | 2.6   | 2.6   | 3.0  | 2.8  | 3.2   | 2.4  | 3.5   | 105.6%    | 2004-2020 | 4.2 (2.9;5.4)*    |           |                   |
|                                       | Females           | 6.4   | 7.1   | 8.0   | 7.5   | 7.5   | 7.2   | 8.5   | 11.9  | 12.1  | 11.9  | 12.4  | 13.3  | 11.7 | 12.9 | 15.6  | 14.7 | 16.9  | 164.8%    | 2004-2020 | 5.9 (4.7;7.1)*    |           |                   |
| % centenarians admissions (x100)      | Total             | 10.7% | 11.2% | 12.2% | 10.6% | 10.3% | 8.8%  | 9.7%  | 11.2% | 11.0% | 10.4% | 10.2% | 9.4%  | 7.8% | 8.6% | 9.4%  | 8.7% | 9.8%  | -8.3%     | 2004-2020 | -1.5 (-2.4;-0.5)* |           |                   |
|                                       | Males             | 6.7%  | 6.2%  | 6.8%  | 6.6%  | 6.8%  | 5.8%  | 7.5%  | 5.4%  | 6.4%  | 7.4%  | 6.9%  | 6.9%  | 6.7% | 6.9% | 7.2%  | 5.3% | 7.2%  | 7.8%      | 2004-2020 | 0.2 (-0.9;1.3)    |           |                   |
|                                       | Females           | 12.5% | 13.5% | 14.7% | 12.1% | 11.6% | 10.0% | 10.6% | 13.2% | 12.6% | 11.4% | 11.2% | 10.1% | 8.1% | 9.0% | 10.1% | 9.7% | 10.6% | -15.1%    | 2004-2020 | -2.1 (-3.3;-0.9)* |           |                   |
| % hip admissions per 100 centenarians | Total             | 1.6%  | 1.8%  | 1.8%  | 2.3%  | 2.5%  | 2.1%  | 2.3%  | 2.6%  | 2.5%  | 2.3%  | 2.1%  | 2.1%  | 1.9% | 2.0% | 2.3%  | 2.0% | 2.0%  | 22.0%     | 2004-2008 | 11.5 (0.9-23.3)*  | 2008-2020 | -1.7 (-3.2;-0.3)* |
|                                       | Males             | 1.1%  | 1.3%  | 1.3%  | 1.9%  | 2.2%  | 1.9%  | 2.4%  | 1.5%  | 1.8%  | 1.9%  | 1.6%  | 1.6%  | 1.7% | 1.6% | 1.8%  | 1.3% | 1.5%  | 40.2%     | 2004-2008 | 18.6 (2.8;36.8)*  | 2008-2020 | -2.8 (-4.9;-0.6)* |
|                                       | Females           | 1.8%  | 2.0%  | 2.0%  | 2.3%  | 2.6%  | 2.2%  | 2.3%  | 2.9%  | 2.6%  | 2.4%  | 2.3%  | 2.2%  | 1.9% | 2.1% | 2.5%  | 2.2% | 2.1%  | 15.0%     | 2004-2020 | -0.1 (-1.4;1.3)   |           |                   |

*Note:* % increase: total percentage increase between 2004 and 2020; APC: Annual Percentage Change; CI: Confidence Interval (\*p<0.05).

**Supplementary Table 3.** Trends in the baseline characteristics, surgical decision and in-hospital outcomes in hip fracture admissions among centenarians, Spain, 2004-2020.

|                                         | 2004                  | 2005                   | 2006                  | 2007                  | 2008                  | 2009                  | 2010                  | 2011                  | 2012                  | 2013                  | 2014                  | 2015                  | 2016                  | 2017                  | 2018                  | 2019                  | 2020                  | p      |
|-----------------------------------------|-----------------------|------------------------|-----------------------|-----------------------|-----------------------|-----------------------|-----------------------|-----------------------|-----------------------|-----------------------|-----------------------|-----------------------|-----------------------|-----------------------|-----------------------|-----------------------|-----------------------|--------|
| Age (years)                             | 101.4+-1.7<br>(101.0) | 101.0+-<br>101.2 (1.5) | 101.3+-1.7<br>(101.0) | 101.2+-1.6<br>(101.0) | 101.3+-1.7<br>(101.0) | 101.2+-1.6<br>(101.0) | 101.2+-1.6<br>(101.0) | 101.3+-1.5<br>(101.0) | 101.3+-1.5<br>(101.0) | 101.4+-1.6<br>(101.0) | 101.4+-1.5<br>(101.0) | 101.3+-1.5<br>(101.0) | 101.5+-1.8<br>(101.0) | 101.3+-1.7<br>(101.0) | 101.3+-1.7<br>(101.0) | 101.5+-1.8<br>(101.0) | 101.2+-1.7<br>(101.0) | 0.508  |
| Sex, female                             | 81.0%                 | 82.7%                  | 82.7%                 | 82.2%                 | 82.1%                 | 81.4%                 | 78.5%                 | 87.9%                 | 84.7%                 | 82.4%                 | 84.1%                 | 84.6%                 | 80.9%                 | 82.8%                 | 83.8%                 | 86.3%                 | 83.2%                 | 0.238  |
| Injury characteristics                  |                       |                        |                       |                       |                       |                       |                       |                       |                       |                       |                       |                       |                       |                       |                       |                       |                       |        |
| Pertrochanteric fracture                | 57.1%                 | 50.6%                  | 56.8%                 | 51.7%                 | 52.7%                 | 49.2%                 | 50.5%                 | 53.8%                 | 58.2%                 | 48.7%                 | 52.3%                 | 53.6%                 | 49.1%                 | 53.5%                 | 51.9%                 | 54.0%                 | 47.5%                 |        |
| Subtrochanteric fracture                | 6.8%                  | 4.3%                   | 7.6%                  | 5.6%                  | 11.4%                 | 7.3%                  | 6.5%                  | 4.5%                  | 4.7%                  | 4.8%                  | 8.1%                  | 5.6%                  | 7.2%                  | 4.3%                  | 6.6%                  | 7.0%                  | 7.4%                  |        |
| Intracapsular fracture                  | 36.1%                 | 45.1%                  | 35.7%                 | 42.8%                 | 35.9%                 | 43.5%                 | 43.0%                 | 41.7%                 | 37.1%                 | 46.5%                 | 39.6%                 | 40.8%                 | 43.7%                 | 42.2%                 | 41.5%                 | 39.0%                 | 45.1%                 |        |
| Admission at<br>traumatology department | 92.6%                 | 95.5%                  | 97.2%                 | 93.8%                 | 95.5%                 | 95.3%                 | 95.8%                 | 94.5%                 | 94.5%                 | 95.4%                 | 96.7%                 | 92.4%                 | 94.1%                 | 94.5%                 | 94.2%                 | 93.8%                 | 94.7%                 |        |
| Number of chronic<br>diseases           | 1.3+-1.3<br>(1.0)     | 1.0+-1.3<br>(1.3)      | 1.3+-1.2<br>(1.0)     | 1.4+-1.3<br>(1.0)     | 1.6+-1.4<br>(1.0)     | 1.7+-1.4<br>(2.0)     | 1.8+-1.6<br>(2.0)     | 2.0+-1.5<br>(2.0)     | 2.0+-1.6<br>(2.0)     | 2.2+-1.7<br>(2.0)     | 2.2+-1.6<br>(2.0)     | 2.2+-1.8<br>(2.0)     | 2.1+-1.8<br>(2.0)     | 2.2+-1.7<br>(2.0)     | 2.4+-1.9<br>(2.0)     | 2.5+-1.8<br>(2.0)     | 2.6+-1.8<br>(2.0)     | <0.001 |
| 0                                       | 33.3%                 | 32.7%                  | 30.3%                 | 29.4%                 | 26.1%                 | 20.9%                 | 24.8%                 | 18.2%                 | 20.7%                 | 18.7%                 | 14.5%                 | 16.3%                 | 18.4%                 | 17.8%                 | 16.8%                 | 14.3%                 | 9.7%                  |        |
| 1                                       | 28.6%                 | 29.0%                  | 36.2%                 | 25.6%                 | 25.0%                 | 27.1%                 | 22.9%                 | 23.9%                 | 21.8%                 | 18.7%                 | 26.1%                 | 23.5%                 | 23.8%                 | 21.1%                 | 20.9%                 | 15.2%                 | 22.4%                 |        |
| 2                                       | 21.8%                 | 19.1%                  | 16.8%                 | 26.7%                 | 23.4%                 | 26.6%                 | 22.9%                 | 24.6%                 | 24.0%                 | 26.4%                 | 22.3%                 | 19.9%                 | 22.0%                 | 24.1%                 | 22.3%                 | 22.9%                 | 21.2%                 |        |
| 3                                       | 12.9%                 | 13.6%                  | 11.9%                 | 11.7%                 | 14.7%                 | 14.7%                 | 13.1%                 | 18.6%                 | 16.7%                 | 15.4%                 | 18.4%                 | 19.9%                 | 13.7%                 | 16.5%                 | 14.8%                 | 20.7%                 | 19.5%                 |        |
| >3                                      | 3.4%                  | 5.6%                   | 4.9%                  | 6.7%                  | 10.9%                 | 10.7%                 | 16.4%                 | 14.8%                 | 16.7%                 | 20.9%                 | 18.7%                 | 20.3%                 | 22.0%                 | 20.5%                 | 25.3%                 | 26.8%                 | 27.1%                 |        |
| Multimorbidity                          |                       |                        |                       |                       |                       |                       |                       |                       |                       |                       |                       |                       |                       |                       |                       |                       |                       |        |
| Charlson Comorbidity<br>index (CCI)     | 0.6+-1.2<br>(0.0)     | 0.0+-0.7<br>(0.9)      | 0.5+-0.8<br>(0.0)     | 0.6+-0.8<br>(0.0)     | 0.7+-1.0<br>(0.0)     | 0.8+-1.1<br>(0.0)     | 0.8+-1.1<br>(0.0)     | 0.8+-1.0<br>(0.5)     | 0.9+-1.4<br>(0.0)     | 1.0+-1.2<br>(1.0)     | 0.9+-1.3<br>(0.0)     | 1.0+-1.3<br>(1.0)     | 1.0+-1.4<br>(0.0)     | 0.9+-1.2<br>(1.0)     | 1.2+-1.4<br>(1.0)     | 1.2+-1.5<br>(1.0)     | 1.2+-1.4<br>(1.0)     | <0.001 |
| Severe<br>comorbidity (CCI<br>≥ 3)      | 7.5%                  | 6.8%                   | 3.2%                  | 2.2%                  | 7.1%                  | 8.5%                  | 7.9%                  | 9.5%                  | 10.9%                 | 13.2%                 | 11.7%                 | 13.1%                 | 11.9%                 | 9.6%                  | 19.2%                 | 17.7%                 | 15.6%                 | <0.001 |
| Comorbidities                           |                       |                        |                       |                       |                       |                       |                       |                       |                       |                       |                       |                       |                       |                       |                       |                       |                       |        |
| Hypertension                            | 29.9%                 | 31.5%                  | 30.8%                 | 35.0%                 | 35.3%                 | 43.5%                 | 42.1%                 | 48.1%                 | 42.2%                 | 45.1%                 | 47.7%                 | 49.7%                 | 45.5%                 | 46.9%                 | 37.6%                 | 44.8%                 | 47.5%                 | <0.001 |

|                             |       |       |       |       |       |       |       |       |       |       |        |       |       |       |       |       |       |        |
|-----------------------------|-------|-------|-------|-------|-------|-------|-------|-------|-------|-------|--------|-------|-------|-------|-------|-------|-------|--------|
| Dyslipemia                  | 0.0%  | 1.9%  | 2.2%  | 3.9%  | 1.1%  | 1.7%  | 3.3%  | 6.1%  | 3.6%  | 6.6%  | 8.5%   | 9.2%  | 8.3%  | 10.6% | 15.1% | 19.2% | 17.1% | <0.001 |
| Diabetes                    | 6.1%  | 6.2%  | 7.6%  | 8.9%  | 3.8%  | 8.5%  | 10.3% | 9.1%  | 10.5% | 11.7% | 7.8%   | 12.7% | 12.3% | 10.6% | 8.5%  | 11.6% | 12.4% | <0.001 |
| Coronary heart disease      | 5.4%  | 14.2% | 4.3%  | 10.6% | 16.3% | 10.2% | 13.6% | 9.1%  | 11.3% | 18.3% | 13.4%  | 9.8%  | 8.3%  | 12.5% | 14.8% | 13.4% | 15.3% | 0.922  |
| Heart failure               | 6.8%  | 4.9%  | 5.4%  | 7.2%  | 8.2%  | 7.9%  | 7.0%  | 6.8%  | 6.2%  | 7.3%  | 7.4%   | 7.2%  | 8.3%  | 5.6%  | 5.2%  | 5.8%  | 7.7%  | 0.006  |
| Atrial fibrillation         | 4.1%  | 7.4%  | 7.6%  | 5.0%  | 13.0% | 6.8%  | 8.9%  | 19.3% | 10.5% | 12.5% | 13.8%  | 12.7% | 14.1% | 11.6% | 15.9% | 13.7% | 18.0% | <0.001 |
| Other arrhythmias           | 3.4%  | 1.9%  | 5.9%  | 4.4%  | 3.8%  | 4.0%  | 3.7%  | 3.8%  | 4.4%  | 3.3%  | 3.2%   | 4.6%  | 4.0%  | 2.6%  | 4.4%  | 6.1%  | 2.4%  | 0.936  |
| Chronic pulmonary disease   | 5.4%  | 7.4%  | 6.5%  | 6.1%  | 7.1%  | 9.6%  | 6.5%  | 5.3%  | 5.1%  | 6.2%  | 4.2%   | 6.2%  | 6.5%  | 4.0%  | 7.7%  | 8.8%  | 6.8%  | 0.731  |
| Cerebrovascular disease     | 0.7%  | 1.2%  | 0.5%  | 0.0%  | 1.6%  | 2.3%  | 2.3%  | 8.0%  | 5.5%  | 5.9%  | 7.1%   | 8.2%  | 6.9%  | 5.0%  | 9.6%  | 8.2%  | 7.7%  | <0.001 |
| Chronic kidney disease      | 6.8%  | 7.4%  | 1.6%  | 2.8%  | 7.1%  | 9.0%  | 7.9%  | 9.1%  | 10.2% | 11.4% | 13.4%  | 13.4% | 13.7% | 12.9% | 19.0% | 21.6% | 18.3% | <0.001 |
| Thyroid disease             | 1.4%  | 1.2%  | 0.5%  | 1.1%  | 2.7%  | 3.4%  | 2.3%  | 2.7%  | 4.0%  | 4.0%  | 3.2%   | 6.9%  | 4.3%  | 4.6%  | 3.8%  | 5.5%  | 10.3% | <0.001 |
| Dementia                    | 15.0% | 12.3% | 14.1% | 5.6%  | 12.0% | 12.4% | 7.5%  | 11.4% | 16.0% | 13.9% | 12.7%  | 12.1% | 15.9% | 14.2% | 18.4% | 16.2% | 16.8% | <0.001 |
| Osteoarthritis              | 4.8%  | 3.7%  | 5.4%  | 4.4%  | 2.7%  | 5.1%  | 6.5%  | 5.3%  | 7.6%  | 5.9%  | 9.5%   | 7.8%  | 5.4%  | 8.3%  | 9.6%  | 10.7% | 8.3%  | <0.001 |
| Osteoporosis                | 4.1%  | 4.9%  | 3.8%  | 2.2%  | 3.8%  | 7.3%  | 6.1%  | 5.3%  | 5.5%  | 7.3%  | 6.7%   | 7.2%  | 7.6%  | 8.9%  | 8.8%  | 11.0% | 7.4%  | <0.001 |
| Urinary incontinence        | 0.7%  | 3.1%  | 1.1%  | 2.2%  | 0.5%  | 2.3%  | 2.8%  | 4.2%  | 4.7%  | 4.8%  | 3.2%   | 4.9%  | 5.8%  | 5.9%  | 8.5%  | 10.1% | 7.7%  | <0.00  |
| Visual loss                 | 3.4%  | 4.3%  | 3.2%  | 3.3%  | 6.5%  | 5.6%  | 7.0%  | 4.9%  | 7.6%  | 9.9%  | 10.6%  | 13.7% | 9.4%  | 5.9%  | 8.8%  | 9.1%  | 10.0% | <0.001 |
| Hearing loss                | 12.2% | 4.3%  | 8.1%  | 8.9%  | 9.8%  | 8.5%  | 9.3%  | 8.0%  | 8.0%  | 9.2%  | 9.2%   | 10.1% | 9.7%  | 7.6%  | 12.9% | 9.5%  | 10.6% | 0.106  |
| Surgery                     | 89.1% | 75.9% | 85.4% | 81.7% | 88.0% | 88.7% | 90.7% | 87.1% | 89.8% | 82.8% | 88.3%  | 90.8% | 85.6% | 89.8% | 88.2% | 87.5% | 87.6% | 0.023  |
| Surgery, internal fixation* | 78.3% | 73.8% | 74.2% | 63.4% | 73.9% | 69.9% | 67.7% | 72.2% | 71.1% | 67.4% | 68.5%  | 67.0% | 58.5% | 47.5% | 46.4% | 43.5% | 38.6% | <0.001 |
| Open reduction              | 41.6% | 43.3% | 42.6% | 40.2% | 31.9% | 28.4% | 27.7% | 27.4% | 19.2% | 18.1% | 17.1%  | 15.7% | 40.6% | 41.9% | 53.6% | 66.7% | 53.7% |        |
| Closed reduction            | 58.4% | 56.7% | 57.4% | 59.8% | 68.1% | 71.6% | 72.3% | 72.6% | 80.8% | 81.9% | 82.9%  | 84.3% | 59.4% | 58.1% | 46.4% | 33.3% | 46.3% | 0.870  |
| Surgery, arthroplasty*      | 21.7% | 26.2% | 25.8% | 36.6% | 26.1% | 30.1% | 32.3% | 27.8% | 28.9% | 32.6% | 31.5%  | 33.0% | 41.5% | 52.5% | 53.6% | 56.5% | 61.4% | <0.001 |
| Hemiarthroplasty            | 92.9% | 93.8% | 95.0% | 94.3% | 90.5% | 93.6% | 91.8% | 96.8% | 95.4% | 94.1% | 100.0% | 94.4% | 67.6% | 74.7% | 86.6% | 94.3% | 84.9% |        |
| Total arthroplasty          | 7.1%  | 6.3%  | 5.0%  | 5.7%  | 9.5%  | 6.4%  | 8.2%  | 3.2%  | 4.6%  | 5.9%  | 0.0%   | 5.6%  | 32.4% | 25.3% | 13.4% | 5.7%  | 15.1% | <0.001 |

| Surgical delay (days)*                           | 3.4+-2.7<br>(3.0) | 3.0+-3.4<br>(2.8) | 3.9+-3.4<br>(3.5) | 3.9+-3.0<br>(3.0) | 3.2+-3.0<br>(2.0) | 3.2+-2.8<br>(3.0) | 3.4+-2.6<br>(3.0) | 2.9+-3.0<br>(2.0) | 3.1+-2.5<br>(3.0) | 2.9+-2.6<br>(2.0) | 2.8+-2.4<br>(2.0) | 2.8+-2.5<br>(2.0) | 3.0+-3.0<br>(2.0) | 2.4+-2.0<br>(2.0) | 2.1+-2.3<br>(1.0) | 2.3+-2.5<br>(2.0) | 2.3+-2.3<br>(2.0) | <0.001 |
|--------------------------------------------------|-------------------|-------------------|-------------------|-------------------|-------------------|-------------------|-------------------|-------------------|-------------------|-------------------|-------------------|-------------------|-------------------|-------------------|-------------------|-------------------|-------------------|--------|
| <24 hours                                        | 11.9%             | 9.1%              | 11.9%             | 9.6%              | 12.7%             | 13.7%             | 11.6%             | 11.1%             | 8.9%              | 18.1%             | 14.5%             | 17.7%             | 14.8%             | 15.7%             | 23.9%             | 22.0%             | 15.9%             |        |
| 24-48 hours                                      | 15.6%             | 19.3%             | 16.9%             | 9.6%              | 24.6%             | 17.1%             | 16.3%             | 24.0%             | 19.6%             | 14.8%             | 23.0%             | 16.7%             | 20.0%             | 23.9%             | 27.2%             | 21.7%             | 28.8%             |        |
| 48 hours – 3 days                                | 15.6%             | 18.2%             | 10.2%             | 18.4%             | 17.8%             | 17.1%             | 12.2%             | 22.8%             | 20.2%             | 20.8%             | 15.2%             | 17.2%             | 22.2%             | 20.9%             | 16.2%             | 23.5%             | 20.7%             |        |
| 3-4 days                                         | 16.5%             | 15.9%             | 11.0%             | 14.0%             | 9.3%              | 15.4%             | 17.0%             | 11.7%             | 15.5%             | 13.4%             | 15.8%             | 19.3%             | 9.6%              | 15.3%             | 12.6%             | 13.4%             | 12.2%             |        |
| 4-5 days                                         | 14.7%             | 11.4%             | 13.6%             | 14.9%             | 8.5%              | 11.1%             | 12.2%             | 12.9%             | 13.7%             | 10.7%             | 12.1%             | 10.9%             | 12.2%             | 11.2%             | 9.1%              | 7.6%              | 10.2%             |        |
| 5-6 days                                         | 8.3%              | 5.7%              | 7.6%              | 11.4%             | 8.5%              | 7.7%              | 15.0%             | 6.4%              | 6.5%              | 7.4%              | 7.3%              | 6.8%              | 6.1%              | 4.9%              | 3.9%              | 4.0%              | 3.4%              |        |
| 6-7 days                                         | 5.5%              | 9.1%              | 10.2%             | 6.1%              | 5.9%              | 6.8%              | 5.4%              | 2.3%              | 7.1%              | 4.7%              | 3.6%              | 2.6%              | 5.2%              | 2.2%              | 3.2%              | 3.2%              | 4.4%              |        |
| >=7 days                                         | 11.9%             | 11.4%             | 18.6%             | 15.8%             | 12.7%             | 11.1%             | 10.2%             | 8.8%              | 8.3%              | 10.1%             | 8.5%              | 8.9%              | 10.0%             | 6.0%              | 3.9%              | 4.7%              | 4.4%              |        |
| In-hospital complications                        |                   |                   |                   |                   |                   |                   |                   |                   |                   |                   |                   |                   |                   |                   |                   |                   |                   |        |
| Respiratory tract infection                      | 2.7%              | 4.9%              | 4.3%              | 3.3%              | 3.3%              | 6.2%              | 2.3%              | 3.8%              | 2.9%              | 4.8%              | 3.5%              | 4.9%              | 4.7%              | 6.3%              | 6.3%              | 6.7%              | 5.6%              | 0.006  |
| Urinary tract infection                          | 3.4%              | 4.3%              | 2.2%              | 2.2%              | 6.5%              | 3.4%              | 2.8%              | 4.9%              | 4.4%              | 5.5%              | 6.0%              | 3.6%              | 6.5%              | 7.3%              | 4.1%              | 7.3%              | 8.6%              | <0.001 |
| Acute respiratory failure                        | 4.1%              | 5.6%              | 5.4%              | 4.4%              | 7.1%              | 5.1%              | 5.1%              | 4.5%              | 4.7%              | 8.4%              | 4.6%              | 6.2%              | 6.5%              | 7.3%              | 8.5%              | 7.3%              | 4.7%              | 0.084  |
| Acute kidney injury                              | 0.7%              | 3.1%              | 1.1%              | 2.8%              | 3.8%              | 6.2%              | 8.4%              | 5.7%              | 10.2%             | 10.3%             | 8.8%              | 7.8%              | 7.9%              | 5.6%              | 11.8%             | 11.3%             | 9.7%              | <0.001 |
| Electrolyte disturbance                          | 2.0%              | 3.7%              | 0.0%              | 3.3%              | 3.8%              | 3.4%              | 3.7%              | 4.9%              | 6.5%              | 8.1%              | 5.7%              | 6.5%              | 6.1%              | 5.3%              | 7.4%              | 5.8%              | 7.1%              | <0.001 |
| Constipation or adynamic ileus                   | 2.7%              | 3.1%              | 2.7%              | 2.8%              | 3.3%              | 2.3%              | 5.6%              | 4.5%              | 5.5%              | 7.0%              | 8.8%              | 5.6%              | 7.2%              | 7.9%              | 6.9%              | 9.1%              | 6.8%              | <0.001 |
| Anemia                                           | 14.3%             | 17.9%             | 16.2%             | 18.9%             | 23.9%             | 24.9%             | 21.5%             | 24.2%             | 28.0%             | 35.5%             | 30.7%             | 29.4%             | 28.2%             | 30.4%             | 30.2%             | 35.7%             | 28.6%             | <0.001 |
| Transfusion                                      | 19.0%             | 19.8%             | 17.3%             | 18.9%             | 26.1%             | 24.9%             | 23.4%             | 27.3%             | 28.0%             | 33.0%             | 30.4%             | 26.8%             | 14.8%             | 15.8%             | 22.5%             | 29.9%             | 23.9%             | 0.227  |
| Urinary catheterization                          | 1.4%              | 3.1%              | 4.9%              | 3.9%              | 4.9%              | 3.4%              | 4.2%              | 2.7%              | 5.5%              | 4.0%              | 5.3%              | 4.2%              | 4.7%              | 2.3%              | 3.6%              | 4.3%              | 3.5%              | 0.833  |
| Malnutrition                                     | 0.7%              | 2.5%              | 0.0%              | 4.4%              | 3.3%              | 3.4%              | 5.1%              | 6.4%              | 5.8%              | 7.7%              | 6.4%              | 11.8%             | 9.7%              | 9.9%              | 14.3%             | 16.8%             | 12.7%             | <0.001 |
| Delirium                                         | 2.0%              | 1.2%              | 2.7%              | 3.9%              | 4.3%              | 4.0%              | 6.1%              | 3.0%              | 5.1%              | 7.0%              | 9.9%              | 9.5%              | 10.1%             | 8.3%              | 9.3%              | 11.6%             | 8.0%              | <0.001 |
| Pressure ulcers                                  | 0.0%              | 2.5%              | 4.3%              | 2.8%              | 5.4%              | 2.8%              | 5.1%              | 5.3%              | 5.1%              | 5.1%              | 6.7%              | 2.6%              | 4.0%              | 5.6%              | 2.7%              | 5.2%              | 5.3%              | 0.090  |
| Pharmacologic or procedure-related complications | 11.6%             | 8.0%              | 9.7%              | 6.7%              | 9.2%              | 9.0%              | 9.8%              | 6.8%              | 9.8%              | 8.8%              | 9.2%              | 10.1%             | 10.8%             | 11.2%             | 7.4%              | 9.8%              | 10.9%             | 0.415  |

|                                     |                     |                      |                     |                     |                      |                     |                     |                     |                    |                    |                    |                    |                    |                    |                     |                     |                   |        |
|-------------------------------------|---------------------|----------------------|---------------------|---------------------|----------------------|---------------------|---------------------|---------------------|--------------------|--------------------|--------------------|--------------------|--------------------|--------------------|---------------------|---------------------|-------------------|--------|
| In-hospital mortality               | 19.70%              | 17.30%               | 20.50%              | 13.90%              | 11.40%               | 19.20%              | 15.00%              | 14.80%              | 17.50%             | 17.20%             | 12.70%             | 9.20%              | 11.20%             | 15.80%             | 15.90%              | 12.80%              | 16.20%            | 0.051  |
| Place of discharge.<br>nursing home | 0.9%                | 1.5%                 | 4.1%                | 8.4%                | 8.0%                 | 7.0%                | 6.6%                | 7.2%                | 8.4%               | 7.4%               | 10.4%              | 14.2%              | 10.7%              | 10.6%              | 16.2%               | 11.7%               | 7.6%              | <0.001 |
| Hospital stay (days)                | 11.3+-6.0<br>(11.0) | 11.0+-12.6<br>(11.3) | 12.1+-8.0<br>(11.0) | 13.0+-9.2<br>(11.0) | 13.4+-9.7<br>(11.0)  | 11.2+-6.6<br>(10.0) | 11.7+-8.2<br>(10.0) | 11.2+-14.7<br>(9.0) | 10.5+-7.6<br>(9.0) | 10.1+-7.0<br>(9.0) | 9.8+-7.2<br>(8.0)  | 9.8+-6.4<br>(9.0)  | 9.9+-6.7<br>(8.0)  | 9.7+-6.0<br>(9.0)  | 9.6+-7.5<br>(8.0)   | 10.0+-11.0<br>(8.0) | 9.3+-7.8<br>(8.0) | <0.001 |
| Survivors                           | 12.0+-6.0<br>(12.0) | 12.0+-13.0<br>(11.0) | 13.0+-8.0<br>(11.0) | 13.0+-9.0<br>(12.0) | 14.0+-10.0<br>(12.0) | 11.0+-6.0<br>(10.0) | 12.0+-9.0<br>(10.0) | 12.0+-15.0<br>(9.0) | 11.0+-7.0<br>(9.0) | 10.0+-7.0<br>(9.0) | 10.0+-7.0<br>(9.0) | 10.0+-7.0<br>(9.0) | 10.0+-7.0<br>(8.0) | 10.0+-6.0<br>(9.0) | 9.0+-6.0<br>(8.0)   | 10.0+-11.0<br>(8.0) | 9.0+-8.0<br>(8.0) | <0.001 |
| Non-survivors                       | 10.0+-7.0<br>(8.0)  | 8.0+-11.0<br>(11.0)  | 11.0+-8.0<br>(9.0)  | 11.0+-13.0<br>(9.0) | 11.0+-9.0<br>(8.0)   | 10.0+-7.0<br>(9.0)  | 9.0+-5.0<br>(9.0)   | 9.0+-9.0<br>(6.0)   | 10.0+-8.0<br>(8.0) | 9.0+-7.0<br>(8.0)  | 8.0+-6.0<br>(7.0)  | 8.0+-5.0<br>(7.0)  | 9.0+-7.0<br>(7.0)  | 9.0+-8.0<br>(6.0)  | 10.0+-14.0<br>(7.0) | 10.0+-11.0<br>(7.0) | 8.0+-7.0<br>(7.0) | 0.054  |

*Note:* Continuous variables are expressed as mean  $\pm$  standard deviation (median) and categorical variables as number (percentage). \* Percentage of total number of surgeries (71.2% of patients).

**Supplementary Table 4.** Trends in the basal characteristics, timing of surgery and in-hospital outcomes according to surgery decision. Hip fracture admissions in centenarians in Spain, 2004-2020.

|                                  | No surgery |       |           |       |           |       |        | Internal fixation |       |           |       |           |       |        | Arthroplasty |       |           |       |           |       |        |
|----------------------------------|------------|-------|-----------|-------|-----------|-------|--------|-------------------|-------|-----------|-------|-----------|-------|--------|--------------|-------|-----------|-------|-----------|-------|--------|
|                                  | 2004-2010  |       | 2011-2015 |       | 2016-2020 |       | p      | 2004-2010         |       | 2011-2015 |       | 2016-2020 |       | p      | 2004-2010    |       | 2011-2015 |       | 2016-2020 |       | p      |
| Age (years)                      | 101.4±1.7  | 101   | 101.5±1.7 | 101   | 101.6±1.9 | 101   | 0.382  | 101.3±1.6         | 101   | 101.3±1.5 | 101   | 101.3±1.6 | 101   | 0.672  | 101.2±1.6    | 101   | 101.3±1.4 | 101   | 101.2±1.5 | 101   | 0.766  |
| Sex. female                      | 138        | 78.0% | 138       | 81.2% | 159       | 80.7% | 0.518  | 638               | 84.4% | 739       | 88.0% | 323       | 86.4% | 0.190  | 229          | 75.3% | 295       | 78.9% | 317       | 76.2% | 0.866  |
| Injury characteristics           | 0.547      |       |           |       |           |       |        | 0.070             |       |           |       |           |       |        | 0.536        |       |           |       |           |       |        |
| Subtrochanteric fracture         | 5          | 2.8%  | 5         | 2.9%  | 8         | 4.1%  |        | 83                | 11.0% | 71        | 8.5%  | 41        | 11.0% |        | 1            | 0.3%  | 0         | 0.0%  | 0         | 0.0%  |        |
| Pertrochanteric fracture         | 68         | 38.4% | 63        | 37.1% | 64        | 32.5% |        | 578               | 76.5% | 668       | 79.5% | 265       | 70.9% |        | 6            | 2.0%  | 9         | 2.4%  | 14        | 3.4%  |        |
| Intracapsular fracture           | 104        | 58.8% | 102       | 60.0% | 125       | 63.5% |        | 95                | 12.6% | 101       | 12.0% | 68        | 18.2% |        | 297          | 97.7% | 365       | 97.6% | 402       | 96.6% |        |
| Number of chronic diseases       | 1.6±1.3    | 1     | 2.4±1.7   | 2     | 2.3±1.7   | 2     | <0.001 | 1.5±1.3           | 1     | 2.1±1.6   | 2     | 2.3±1.8   | 2     | <0.001 | 1.5±1.5      | 1     | 2±1.7     | 2     | 2.3±1.7   | 2     | <0.001 |
| 0                                | 40         | 22.6% | 25        | 14.7% | 30        | 15.2% |        | 214               | 28.3% | 140       | 16.7% | 67        | 17.9% |        | 92           | 30.3% | 80        | 21.4% | 60        | 14.4% |        |
| 1                                | 57         | 32.2% | 34        | 20.0% | 44        | 22.3% |        | 208               | 27.5% | 200       | 23.8% | 75        | 20.1% |        | 78           | 25.7% | 85        | 22.7% | 96        | 23.1% |        |
| 2                                | 41         | 23.2% | 37        | 21.8% | 45        | 22.8% |        | 174               | 23.0% | 202       | 24.0% | 80        | 21.4% |        | 64           | 21.1% | 81        | 21.7% | 99        | 23.8% |        |
| 3                                | 23         | 13.0% | 31        | 18.2% | 34        | 17.3% |        | 103               | 13.6% | 159       | 18.9% | 65        | 17.4% |        | 36           | 11.8% | 59        | 15.8% | 72        | 17.3% |        |
| >3                               | 16         | 9.0%  | 43        | 25.3% | 44        | 22.3% |        | 57                | 7.5%  | 139       | 16.5% | 87        | 23.3% |        | 34           | 11.2% | 69        | 18.4% | 89        | 21.4% |        |
| Multimorbidity                   | 80         | 45.2% | 111       | 65.3% | 123       | 62.4% | <0.001 | 334               | 44.2% | 500       | 59.5% | 232       | 62.0% | <0.001 | 134          | 44.1% | 209       | 55.9% | 260       | 62.5% | <0.001 |
| Charlson Comorbidity index (CCI) | 1±1.1      | 1     | 1.4±1.5   | 1     | 1.2±1.5   | 1     | 0.408  | 0.5±0.9           | 0     | 0.8±1.2   | 0     | 1.1±1.5   | 1     | <0.001 | 0.7±1.1      | 0     | 0.8±1.2   | 0     | 1.1±1.4   | 1     | <0.001 |

|                                       |    |       |    |       |    |       |        |             |       |               |       |               |       |        |               |       |               |       |               |       |        |
|---------------------------------------|----|-------|----|-------|----|-------|--------|-------------|-------|---------------|-------|---------------|-------|--------|---------------|-------|---------------|-------|---------------|-------|--------|
| Severe comorbidity<br>(CCI $\geq 3$ ) | 19 | 10.7% | 39 | 22.9% | 30 | 15.2% | 0.276  | 37          | 4.9%  | 85            | 10.1% | 52            | 13.9% | <0.001 | 20            | 6.6%  | 38            | 10.2% | 71            | 17.1% | <0.001 |
| Surgical delay<br>(days)*             | -  | -     | -  | -     | -  | -     | -      | 3.4 $\pm$ 3 | 3     | 2.8 $\pm$ 2.6 | 2     | 2.4 $\pm$ 2.7 | 2     | <0.001 | 3.5 $\pm$ 2.6 | 3     | 3.2 $\pm$ 2.6 | 3     | 2.6 $\pm$ 2.3 | 2     | <0.001 |
| <24 horas                             | -  | -     | -  | -     | -  | -     | -      | 73          | 12.8% | 96            | 16.8% | 78            | 21.7% |        | 19            | 8.4%  | 22            | 8.6%  | 54            | 13.3% |        |
| [24-48) horas                         | -  | -     | -  | -     | -  | -     | -      | 98          | 17.1% | 110           | 19.3% | 96            | 26.7% |        | 39            | 17.2% | 54            | 21.0% | 96            | 23.6% |        |
| $\geq$ 48 horas                       | -  | -     | -  | -     | -  | -     | -      | 401         | 70.1% | 365           | 63.9% | 185           | 51.5% |        | 169           | 74.4% | 181           | 70.4% | 257           | 63.1% |        |
| In-hospital<br>complications          |    |       |    |       |    |       |        |             |       |               |       |               |       |        |               |       |               |       |               |       |        |
| Respiratory tract<br>infection        | 11 | 6.2%  | 6  | 3.5%  | 12 | 6.1%  | 0.988  | 33          | 4.4%  | 34            | 4.0%  | 17            | 4.5%  | 0.965  | 3             | 1.0%  | 16            | 4.3%  | 25            | 6.0%  | <0.001 |
| Urinary tract<br>infection            | 9  | 5.1%  | 10 | 5.9%  | 14 | 7.1%  | 0.711  | 22          | 2.9%  | 37            | 4.4%  | 26            | 7.0%  | 0.002  | 12            | 3.9%  | 20            | 5.3%  | 26            | 6.3%  | 0.177  |
| Acute respiratory<br>failure          | 16 | 9.0%  | 18 | 10.6% | 13 | 6.6%  | 0.384  | 35          | 4.6%  | 39            | 4.6%  | 19            | 5.1%  | 0.768  | 14            | 4.6%  | 22            | 5.9%  | 32            | 7.7%  | 0.086  |
| Acute kidney injury                   | 11 | 6.2%  | 20 | 11.8% | 18 | 9.1%  | 0.348  | 29          | 3.8%  | 62            | 7.4%  | 32            | 8.6%  | <0.001 | 9             | 3.0%  | 35            | 9.4%  | 39            | 9.4%  | 0.002  |
| Electrolyte<br>disturbance            | 5  | 2.8%  | 12 | 7.1%  | 14 | 7.1%  | 0.08   | 19          | 2.5%  | 45            | 5.4%  | 27            | 7.2%  | <0.001 | 10            | 3.3%  | 30            | 8.0%  | 25            | 6.0%  | 0.185  |
| Constipation or<br>adynamic ileus     | 6  | 3.4%  | 8  | 4.7%  | 20 | 10.2% | 0.006  | 28          | 3.7%  | 54            | 6.4%  | 26            | 7.0%  | 0.01   | 7             | 2.3%  | 24            | 6.4%  | 34            | 8.2%  | 0.001  |
| Anemia                                | 22 | 12.4% | 27 | 15.9% | 40 | 20.3% | 0.04   | 164         | 21.7% | 278           | 33.1% | 115           | 30.7% | <0.001 | 59            | 19.4% | 103           | 27.5% | 110           | 26.4% | 0.044  |
| Transfusion                           | 15 | 8.5%  | 26 | 15.3% | 15 | 7.6%  | 0.726  | 189         | 25.0% | 266           | 31.7% | 62            | 16.6% | <0.001 | 61            | 20.1% | 110           | 29.4% | 69            | 16.6% | 0.133  |
| Urinary<br>catheterization            | 4  | 2.3%  | 8  | 4.7%  | 5  | 2.5%  | 0.911  | 34          | 4.5%  | 37            | 4.4%  | 10            | 2.7%  | 0.199  | 8             | 2.6%  | 16            | 4.3%  | 14            | 3.4%  | 0.665  |
| Malnutrition                          | 5  | 2.8%  | 7  | 4.1%  | 25 | 12.7% | <0.001 | 20          | 2.6%  | 64            | 7.6%  | 41            | 11.0% | <0.001 | 10            | 3.3%  | 35            | 9.4%  | 53            | 12.7% | <0.001 |
| Delirium                              | 7  | 4.0%  | 9  | 5.3%  | 14 | 7.1%  | 0.182  | 21          | 2.8%  | 62            | 7.4%  | 30            | 8.0%  | <0.001 | 16            | 5.3%  | 23            | 6.1%  | 38            | 9.1%  | 0.038  |
| Pressure ulcers                       | 9  | 5.1%  | 11 | 6.5%  | 8  | 4.1%  | 0.635  | 23          | 3.0%  | 34            | 4.0%  | 16            | 4.3%  | 0.244  | 10            | 3.3%  | 23            | 6.1%  | 20            | 4.8%  | 0.424  |

|                                                        |         |       |         |       |          |       |       |          |       |           |       |         |       |        |      |       |          |       |        |       |        |
|--------------------------------------------------------|---------|-------|---------|-------|----------|-------|-------|----------|-------|-----------|-------|---------|-------|--------|------|-------|----------|-------|--------|-------|--------|
| Pharmacologic or<br>procedure-related<br>complications | 6       | 3.4%  | 10      | 5.9%  | 15       | 7.6%  | 0.08  | 69       | 9.1%  | 72        | 8.6%  | 38      | 10.2% | 0.691  | 37   | 12.2% | 40       | 10.7% | 43     | 10.3% | 0.450  |
| In-hospital mortality                                  | 58      | 32.8% | 60      | 35.3% | 55       | 27.9% | 0.299 | 104      | 13.8% | 93        | 11.1% | 41      | 11.0% | 0.112  | 44   | 14.5% | 38       | 10.2% | 55     | 13.2% | 0.731  |
| Hospital length of<br>stay (days)                      | 7.1±6.1 | 6     | 6.7±6.7 | 4     | 9.4±16.1 | 5     | 0.58  | 12.9±8.4 | 11    | 10.5±10.1 | 9     | 9.6±5.9 | 8     | <0.001 | 13±7 | 12    | 11.3±6.8 | 10    | 10.3±7 | 9     | <0.001 |

*Note:* Continuous variables are expressed as mean ± standard deviation (median) and categorical variables as number (percentage). \* Percentage of total number of surgeries (71.2% of patients).

**Supplementary Table 5.** Trends in the characteristics of hip fracture patients with a surgical delay  $\geq 48$  hours or dead during hospital stay. Hip fracture admissions among centenarians in Spain, 2004-2020.

|                                    | Surgical delay $\geq 48$ hours |       |                 |       |                 |       |        | In-hospital death |              |                 |               |                 |              |        |
|------------------------------------|--------------------------------|-------|-----------------|-------|-----------------|-------|--------|-------------------|--------------|-----------------|---------------|-----------------|--------------|--------|
|                                    | 2004-2010                      |       | 2011-2015       |       | 2016-2020       |       | p      | 2004-2010         |              | 2011-2015       |               | 2016-2020       |              | p      |
| Age (years)                        | 101.2 $\pm$ 1.6                | 101   | 101.2 $\pm$ 1.5 | 101   | 101.2 $\pm$ 1.6 | 101   | 0.902  | 101.4 $\pm$ 1.7   | 101          | 101.5 $\pm$ 1.7 | 101           | 101.5 $\pm$ 1.8 | 101          | 0.496  |
| Sex. female                        | 360                            | 79.3% | 335             | 84.2% | 416             | 83.4% | 0.107  | 161               | 77.8%        | 161             | 81.3%         | 195             | 83.3%        | 0.141  |
| Injury characteristics             | 0.022                          |       |                 |       |                 |       |        | 0.690             |              |                 |               |                 |              |        |
| Subtrochanteric fracture           | 36                             | 7.9%  | 31              | 7.8%  | 32              | 6.4%  |        | 12                | 5.8%         | 13              | 6.6%          | 22              | 9.4%         |        |
| Pertrochanteric fracture           | 251                            | 55.3% | 205             | 51.5% | 246             | 49.3% |        | 115               | 55.6%        | 111             | 56.1%         | 108             | 46.2%        |        |
| Intracapsular fracture             | 167                            | 36.8% | 162             | 40.7% | 221             | 44.3% |        | 80                | 38.6%        | 74              | 37.4%         | 104             | 44.4%        |        |
| Number of chronic diseases         | 1.5 $\pm$ 1.4                  | 1     | 2.1 $\pm$ 1.7   | 2     | 2.4 $\pm$ 1.8   | 2     | <0.001 | 1.7 $\pm$ 1.2     | 2            | 2.4 $\pm$ 1.6   | 2             | 2.4 $\pm$ 1.9   | 2            | <0.001 |
| 0                                  | 131                            | 28.9% | 75              | 18.8% | 73              | 14.6% |        | 37                | 17.9%        | 22              | 11.1%         | 38              | 16.2%        |        |
| 1                                  | 131                            | 28.9% | 91              | 22.9% | 106             | 21.2% |        | 61                | 29.5%        | 41              | 20.7%         | 53              | 22.6%        |        |
| 2                                  | 94                             | 20.7% | 96              | 24.1% | 108             | 21.6% |        | 56                | 27.1%        | 47              | 23.7%         | 42              | 17.9%        |        |
| 3                                  | 66                             | 14.5% | 67              | 16.8% | 78              | 15.6% |        | 37                | 17.9%        | 52              | 26.3%         | 36              | 15.4%        |        |
| >3                                 | 32                             | 7.0%  | 69              | 17.3% | 134             | 26.9% |        | 16                | 7.7%         | 36              | 18.2%         | 65              | 27.8%        |        |
| Multimorbidity                     | 192                            | 42.3% | 232             | 58.3% | 320             | 64.1% | <0.001 | 109               | 52.7%        | 135             | 68.2%         | 143             | 61.1%        | 0.085  |
| Charlson Comorbidity index (CCI)   | 0.6 $\pm$ 1                    | 0     | 0.9 $\pm$ 1.2   | 0     | 1.2 $\pm$ 1.4   | 1     | <0.001 | 0.9 $\pm$ 1.1     | 1            | 1.3 $\pm$ 1.4   | 1             | 1.4 $\pm$ 1.6   | 1            | <0.001 |
| Severe comorbidity (CCI $\geq 3$ ) | 29                             | 6.4%  | 42              | 10.6% | 85              | 17.0% | <0.001 | 23                | 11.1%        | 39              | 19.7%         | 57              | 24.4%        | <0.001 |
| Surgical delay (days)*             | 5.3 $\pm$ 2.5                  | 5     | 4.9 $\pm$ 2.4   | 4     | 4.8 $\pm$ 2.5   | 4     | <0.001 | 3.9 $\pm$ 3.6     | 3            | 3 $\pm$ 3.2     | 2             | 2.5 $\pm$ 2.4   | 2            | 0.001  |
| <24 horas                          |                                |       |                 |       |                 |       |        | 14                | 0.1272727273 | 8               | 0.09090909091 | 27              | 0.1525423729 |        |

|                                    |          |       |          |       |          |       |        |          |              |         |              |         |              |       |
|------------------------------------|----------|-------|----------|-------|----------|-------|--------|----------|--------------|---------|--------------|---------|--------------|-------|
| [24-48) horas                      |          |       |          |       |          |       |        | 15       | 0.1363636364 | 22      | 0.25         | 44      | 0.2485875706 |       |
| >=48 horas                         |          |       |          |       |          |       |        | 81       | 0.7363636364 | 58      | 0.6590909091 | 106     | 0.5988700565 |       |
| In-hospital complications          |          |       |          |       |          |       |        |          |              |         |              |         |              |       |
| Respiratory tract infection        | 17       | 3.7%  | 17       | 4.3%  | 27       | 5.4%  | 0.214  | 22       | 10.6%        | 22      | 11.1%        | 35      | 15.0%        | 0.162 |
| Urinary tract infection            | 13       | 2.9%  | 25       | 6.3%  | 42       | 8.4%  | <0.001 | 7        | 3.4%         | 12      | 6.1%         | 14      | 6.0%         | 0.228 |
| Acute respiratory failure          | 22       | 4.8%  | 25       | 6.3%  | 41       | 8.2%  | 0.035  | 41       | 19.8%        | 29      | 14.6%        | 40      | 17.1%        | 0.476 |
| Acute kidney injury                | 16       | 3.5%  | 36       | 9.0%  | 43       | 8.6%  | 0.003  | 25       | 12.1%        | 41      | 20.7%        | 44      | 18.8%        | 0.070 |
| Electrolyte disturbance            | 19       | 4.2%  | 28       | 7.0%  | 35       | 7.0%  | 0.072  | 12       | 5.8%         | 23      | 11.6%        | 30      | 12.8%        | 0.016 |
| Constipation or adynamic ileus     | 20       | 4.4%  | 29       | 7.3%  | 28       | 5.6%  | 0.447  | 10       | 4.8%         | 16      | 8.1%         | 23      | 9.8%         | 0.050 |
| Anemia                             | 94       | 20.7% | 118      | 29.6% | 171      | 34.3% | <0.001 | 50       | 24.2%        | 56      | 28.3%        | 75      | 32.1%        | 0.067 |
| Transfusion                        | 109      | 24.0% | 124      | 31.2% | 123      | 24.6% | 0.875  | 57       | 27.5%        | 55      | 27.8%        | 58      | 24.8%        | 0.505 |
| Urinary catheterization            | 23       | 5.1%  | 24       | 6.0%  | 22       | 4.4%  | 0.627  | 6        | 2.9%         | 9       | 4.5%         | 16      | 6.8%         | 0.054 |
| Malnutrition                       | 19       | 4.2%  | 40       | 10.1% | 69       | 13.8% | <0.001 | 6        | 2.9%         | 7       | 3.5%         | 19      | 8.1%         | 0.011 |
| Delirium                           | 16       | 3.5%  | 31       | 7.8%  | 43       | 8.6%  | 0.002  | 13       | 6.3%         | 11      | 5.6%         | 27      | 11.5%        | 0.037 |
| Pressure ulcers                    | 20       | 4.4%  | 23       | 5.8%  | 19       | 3.8%  | 0.635  | 6        | 2.9%         | 7       | 3.5%         | 8       | 3.4%         | 0.766 |
| Pharmacologic or procedure-related |          |       |          |       |          |       |        |          |              |         |              |         |              |       |
| complications                      | 53       | 11.7% | 47       | 11.8% | 54       | 10.8% | 0.674  | 34       | 16.4%        | 34      | 17.2%        | 46      | 19.7%        | 0.371 |
| In-hospital mortality              | 60       | 13.2% | 38       | 9.5%  | 71       | 14.2% | 0.599  |          |              |         |              |         |              |       |
| Hospital length of stay (days)     | 15.6±9.3 | 13    | 13.8±7.5 | 12    | 11.8±6.6 | 10    | <0.001 | 10.3±8.6 | 8            | 8.9±7.2 | 7            | 9.3±9.7 | 7            | 0.058 |

*Note:* Continuous variables are expressed as mean ± standard deviation (median) and categorical variables as number (percentage). \* Percentage of total number of surgeries (71.2% of patients).
